# Supplementary material for: High-performance low temperature curable copolyimidesviamultidimensional modulation in alkaline environment and electronic effects of monomers
Source: Royal Society of Chemistry journal article supplement (doi:10.1039/d2ma00991a), 2023-01-01
Supplement: d2ma00991a1.pdf [file d2ma00991a1.pdf]

## Supplementary Material

### **High-performance Low Temperature Curable Copolyimides via Multidimensional Modulation in Alkaline and Electronic Effects of Monomers**

Xialei Lv<sup>§</sup>[a], Shan Huang<sup>§</sup>[a, b], Zimeng He[a], Jinhui Li<sup>\*</sup>[a], Siyao Qiu[a], Tao Wang[a], Yun Bai[a], Yao Zhang[a], Guoping Zhang<sup>\*</sup>[a], and Rong Sun[a]

[a] Shenzhen International Innovation Institutes of Advanced Electronic Materials, Shenzhen Institutes of Advanced Technology, Chinese Academy of Sciences, Shenzhen 518055, China.

[b] Department of Nano Science and Technology Institute, University of Science and Technology of China, Suzhou, 215123, China

§These authors contribute equally to this work.

E-mail: [jh.li@siat.ac.cn](mailto:jh.li@siat.ac.cn) and [gp.zhang@siat.ac.cn](mailto:gp.zhang@siat.ac.cn)

## **Table of Contents**

- I. Experimental section.**
- II. Synthesis of monomers.**
- III. Additional FTIR spectra and XRD patterns of PI films.**
- IV. Additional TMA curves and linearly polarized IR spectroscopy of PI films.**
- V. Additional TGA curves and stress-strain curves of PI films.**
- VI. The cyclic voltammetry curves of monomers.**
- VII. The UV–vis transmission spectra of co-PI films.**
- VIII. Additional detailed data of PI films.**

## I. Experimental Section

### *Instruments*

The NMR spectra were tested by a Bruker AVANCE III 400 MHz spectrometer ( $^1\text{H}$  NMR: 400 MHz,  $^{13}\text{C}$  NMR: 100 MHz) to confirmed the structure of intermediates and end products. The high-performance liquid chromatography (HPLC) was obtained by Ultimate 3000 to estimate the purity of diamine monomer MePMNH<sub>2</sub> and 2MePMNH<sub>2</sub>. The Fourier transform-infrared (FT-IR) spectra and polarized attenuated total reflection/Fourier transform infrared spectroscopy were recorded with Vertex 70 (Bruker, Germany) from 4000 cm<sup>-1</sup> to 600 cm<sup>-1</sup>. Wide-angle X-ray data were collected on a Bruker D8 Advance diffractometer (Bruker, Germany) with CuK $\alpha$  radiation at a wavelength of 0.15418 nm with step scanning by  $2\theta$  intervals from 5° to 50°. The  $d$ -spacing was calculated according to Bragg's equation:  $\lambda = 2d \cdot \sin\theta$ . The thermal properties such as  $T_d$  (thermal decomposition temperature) were tested using a STD Q600 (TA Instruments, America). Coefficient of thermal expansion (CTE) of the PI films and  $T_g$  (glass transition temperature) were measured with thermal mechanical analysis (TMA) with a heating rate of 10°C/min from 30-400°C by NETZSCH TMA 402. The mechanical properties of the samples were also measured using DMA Q800 with a constant stretching speed of 2 N min<sup>-1</sup> at room temperature. The high frequency dielectric constant (10 GHz) of PI films was measured by e5071c keysight ENA vector network analyzer, and the samples were pretreated in oven at 150°C for 2 h. The cyclic voltammetry curves were recorded on a computer-controlled EG&G Potentiostat/Galvanostat model 283 at room temperature with a conventional three-electrode system, which consisted of a platinum wire counter electrode, a AgCl/Ag

reference electrode, and a Pt carbon working electrode of 2 mm diameter. The supporting electrolyte was 0.1 M tetrabutylammonium hexafluorophosphate (Bu<sub>4</sub>NPF<sub>6</sub>) in dry dichloromethane, and ferrocene was added as a calibrant in the whole measurement. Incidentally, most of the general methods are the same as our published paper before.<sup>1</sup>

### **Calculations**

The ground state (S<sub>0</sub>) geometries of the three diamines were optimized by density functional theory (DFT) with B3LYP functional 6-31G basis set via Gaussian 16.<sup>2</sup> The pK<sub>a</sub> values were calculated by B3LYP functional with Def2TZVP basis set.<sup>3</sup> Besides, polarizable continuum model (PCM) with DMAc solvent has been included in pK<sub>a</sub> calculations.<sup>4</sup> To obtain accurate proton energy under DMAc solvent, proton binding with 7 DMAc molecules have been calculated.<sup>5</sup>

## **II. Synthesis of monomers.**

### *Synthesis of 4,4'-((5-methylpyrimidine-2,4-diyl)bis(oxy))dianiline (MePMNH<sub>2</sub>)*

*Synthesis of MePMNO<sub>2</sub>.* As shown in Scheme S1, 2,4-dichloro-5-methylpyrimidine (12.00 g, 73.5 mmol), *p*-nitrophenol (30.68 g, 220.5 mmol), potassium carbonate (30.48 g, 220.5 mmol), and DMF (50 mL) were successively weighed into a 250 mL three-necked round bottom flask and reacted for 1 h at 150 °C under nitrogen. After cooling to room temperature, the reaction solution was extracted with deionized water and dichloromethane. The crude product was collected and purified by chromatography on silica gel with petroleum ether (PE)/dichloromethane (DCM) as an eluent. The purified product was pale-yellow powder with a yield of 85%. <sup>1</sup>H NMR, (400 MHz, DMSO-*d*<sub>6</sub>) δ 8.35 - 8.26 (m, 2H), 8.18 - 8.11 (m, 2H), 8.08 (s, 1H), 7.54 - 7.43 (m, 2H), 7.08 - 6.96 (m, 2H). HRMS (APCI) *m/z*: [M + H]<sup>+</sup> calculated for C<sub>17</sub>H<sub>12</sub>O<sub>6</sub>N<sub>4</sub>, 369.0811; found,

369.0819.

*Synthesis of MePMNH<sub>2</sub>*. The MePMNO<sub>2</sub> (15.00 g, 40.7 mmol), 10% Pd/C (0.90 g), and THF (150 mL) were added into a 500 mL three-necked round bottom flask under nitrogen. After heating to reflux with stirring, 10 mL 85% hydrazine hydrate was added dropwise. The solution was followed by refluxing under nitrogen for 16 h. After filtering to remove Pd/C, the crude product was collected and purified by chromatography on silica gel with petroleum ether (PE)/ethyl acetate (EA) as an eluent. The purified product was brown powder with a yield of 80%. <sup>1</sup>H NMR, (400 MHz, DMSO-*d*<sub>6</sub>), δ 8.14 (d, *J* = 0.8 Hz, 1H), 6.85 (d, *J* = 8.8 Hz, 2H), 6.75 (d, *J* = 8.8 Hz, 2H), 6.55 (dd, *J* = 24.9, 8.8 Hz, 4H), 5.05 (s, 2H), 4.98 (s, 2H), 2.15 (s, 3H). <sup>13</sup>C NMR (100 MHz, DMSO-*d*<sub>6</sub>) δ 169.92, 164.01, 158.89, 146.77, 146.30, 143.46, 142.64, 127.19, 122.51, 122.21, 114.62, 114.60, 112.22, 12.16. HRMS (APCI) *m/z*: [M + H]<sup>+</sup> calculated for C<sub>17</sub>H<sub>16</sub>O<sub>2</sub>N<sub>4</sub>, 309.1330; found, 309.1335.

*Synthesis of 4,4'-((6-methylpyrimidine-2,4-diyl)bis(oxy))dianiline (2MePMNH<sub>2</sub>)*

*Synthesis of 2MePMNO<sub>2</sub>*. 2,4-Dichloro-6-methylpyrimidine (12.00 g, 73.5 mmol), *p*-nitrophenol (30.68 g, 220.5 mmol), potassium carbonate (30.48 g, 220.5 mmol), and DMF (50 mL) were weighed into a 250 mL three-necked round bottom flask and reacted for 12 h at 150°C under nitrogen. The crude product was treated in the same way as synthesis of MePMNO<sub>2</sub>. The purified product was pale-yellow powder with a yield of 81%. <sup>1</sup>H NMR, (400 MHz, DMSO-*d*<sub>6</sub>), δ 8.44-8.08(m, 4H), 7.67 - 7.35 (m, 4H), 6.97 (s, 1H), 2.41 (s, 3H). HRMS (APCI) *m/z*: [M + H]<sup>+</sup> calculated for C<sub>17</sub>H<sub>12</sub>O<sub>6</sub>N<sub>4</sub>, 369.0811; found, 369.0816.

*Synthesis of 2MePMNH<sub>2</sub>*. The 2MePMNO<sub>2</sub> (15.00 g, 40.7 mmol), 10% Pd/C (0.90 g), and THF (150 mL) were added into a 500 mL 3-neck round bottom flask under nitrogen. After heating to reflux with stirring, 10 mL 85% hydrazine hydrate was added dropwise slowly. The solution was followed by refluxing under nitrogen for only 10 min. The crude product was treated in the same way as synthesis of MePMNH<sub>2</sub>. The





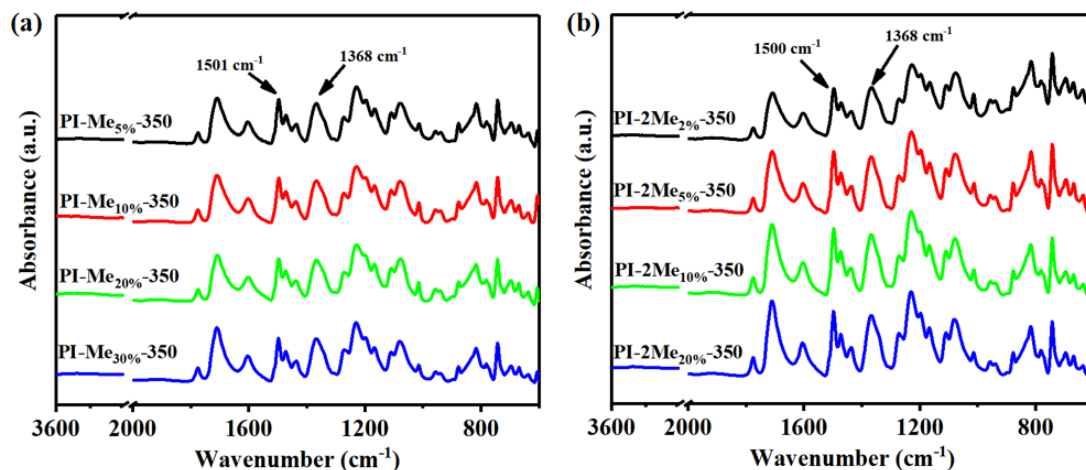

**Fig. S5.** FTIR spectra of (a) (MePMNH<sub>2</sub>/ODA)/ODPA co-PI films and (b) (2MePMNH<sub>2</sub>/ODA)/ODPA co-PI films.

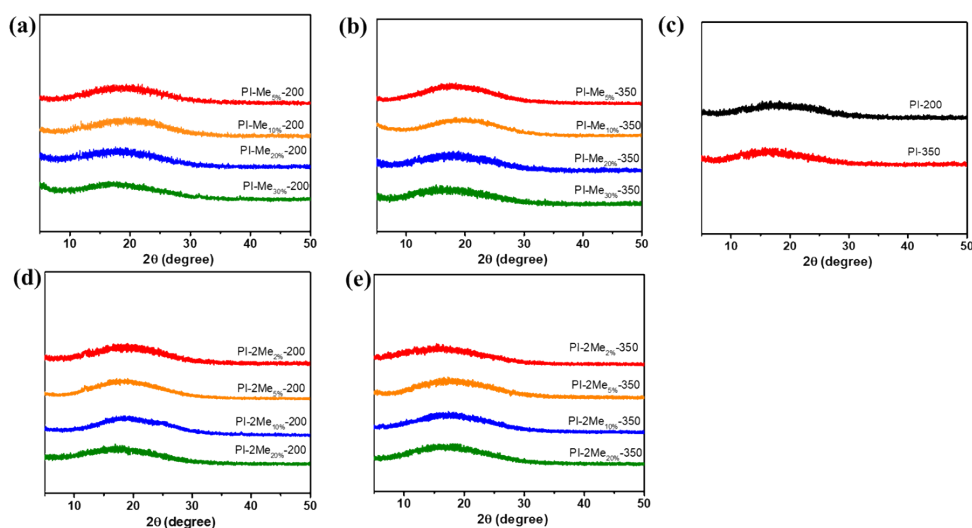

**Fig. S6.** XRD patterns of (a) (MePMNH<sub>2</sub>/ODA)/ODPA co-PI films cured at 200°C, (b) (MePMNH<sub>2</sub>/ODA)/ODPA co-PI films cured at 350°C; (c) (2MePMNH<sub>2</sub>/ODA)/ODPA co-PI films cured at 200°C, (d) (2MePMNH<sub>2</sub>/ODA)/ODPA co-PI films cured at 350°C; (e) ODA/ODPA PI films cured at 200°C and 350°C.

#### IV. Additional TMA curves and linearly polarized IR spectroscopy of PI films.



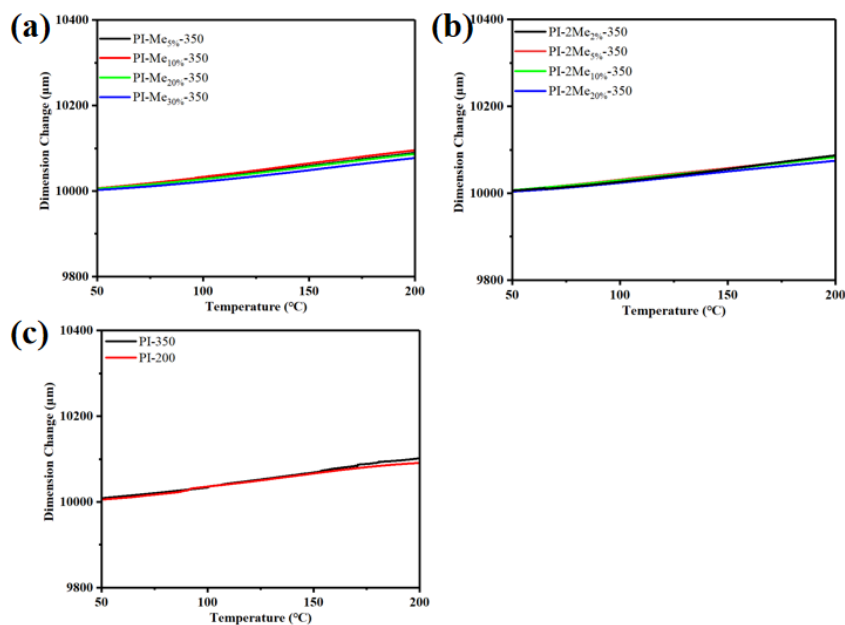

**Fig. S7.** TMA curves of (a) (MePMNH<sub>2</sub>/ODA)/ODPA co-PI films, (b) (2MePMNH<sub>2</sub>/ODA)/ODPA co-PI films and (c) ODA/ODPA PI films.

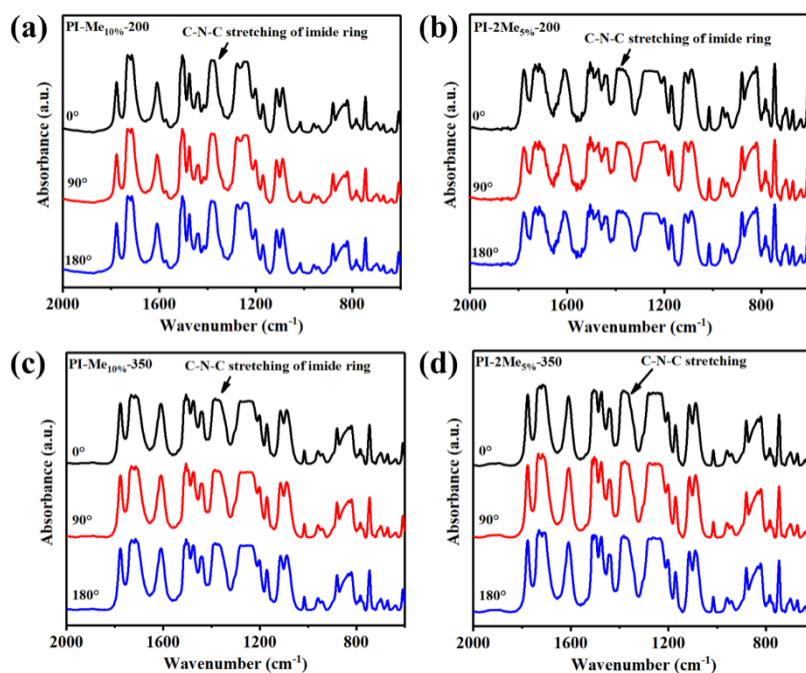

**Fig. S8.** Linearly polarized IR spectroscopy of (a) PI-Me<sub>10%</sub>-200, (b) PI-2Me<sub>5%</sub>-200, (c) PI-Me<sub>10%</sub>-200, (d) PI-2Me<sub>5%</sub>-350.

## V. Additional TGA curves and stress-strain curves of PI films.

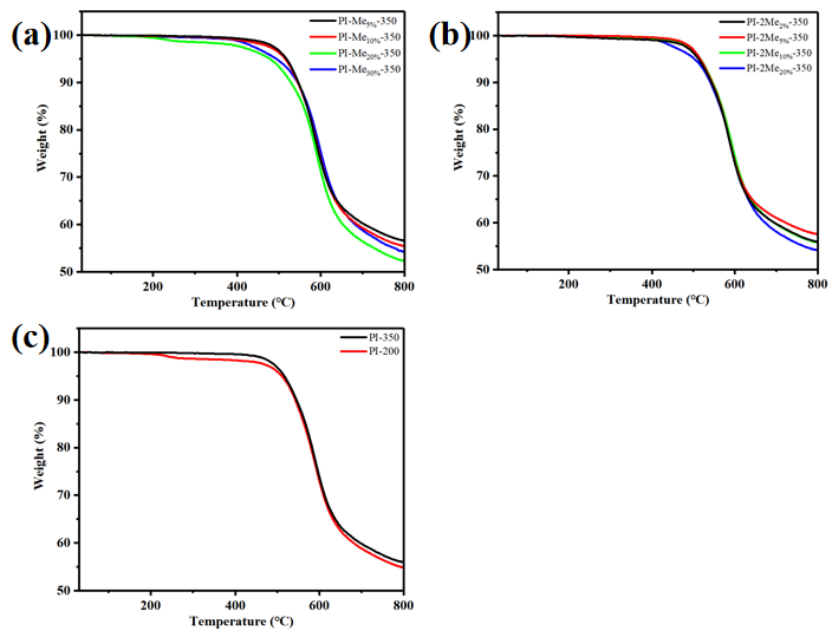

**Fig. S9.** TGA curves of (a) (MePMNH<sub>2</sub>/ODA)/ODPA co-PI films, (b) (2MePMNH<sub>2</sub>/ODA)/ODPA co-PI films and (c) ODA/ODPA PI films.

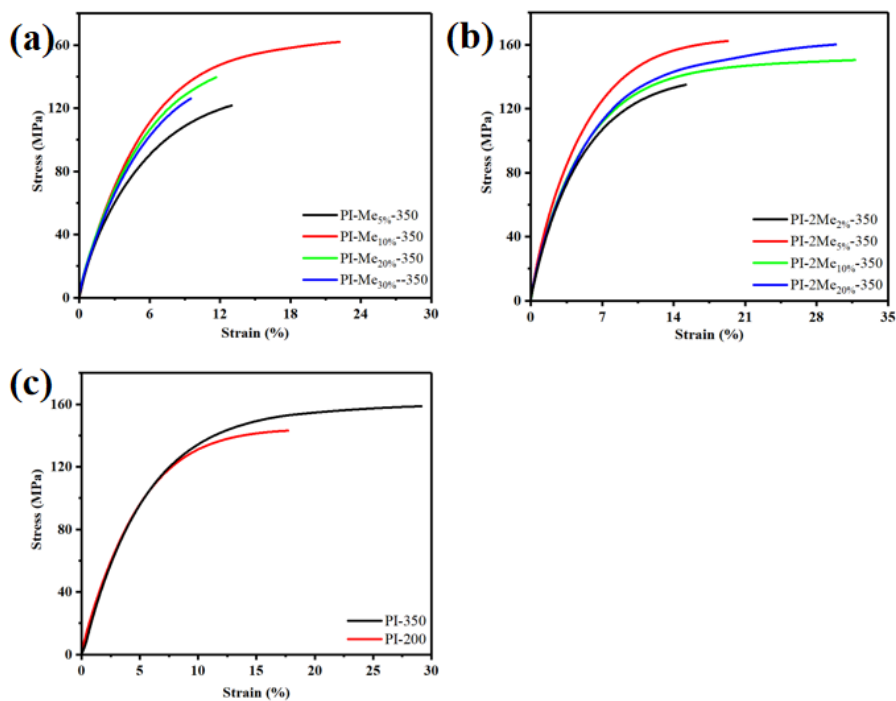

**Fig. S10.** Typical stress-strain curves of (a) (MePMNH<sub>2</sub>/ODA)/ODPA co-PI films, (b) (2MePMNH<sub>2</sub>/ODA)/ODPA co-PI films and (c) ODA/ODPA PI films.

## VI. The cyclic voltammety curves.

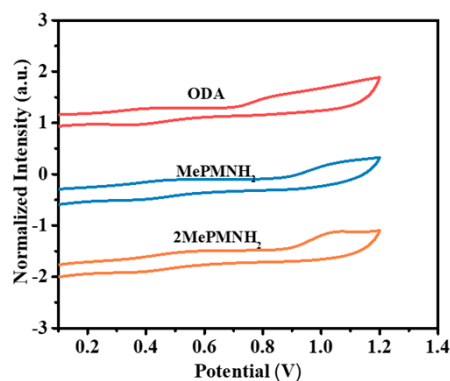

Fig. S11. The cyclic voltammety curves of three diamines.

## VII. UV-vis transmission spectra of co-PI films.

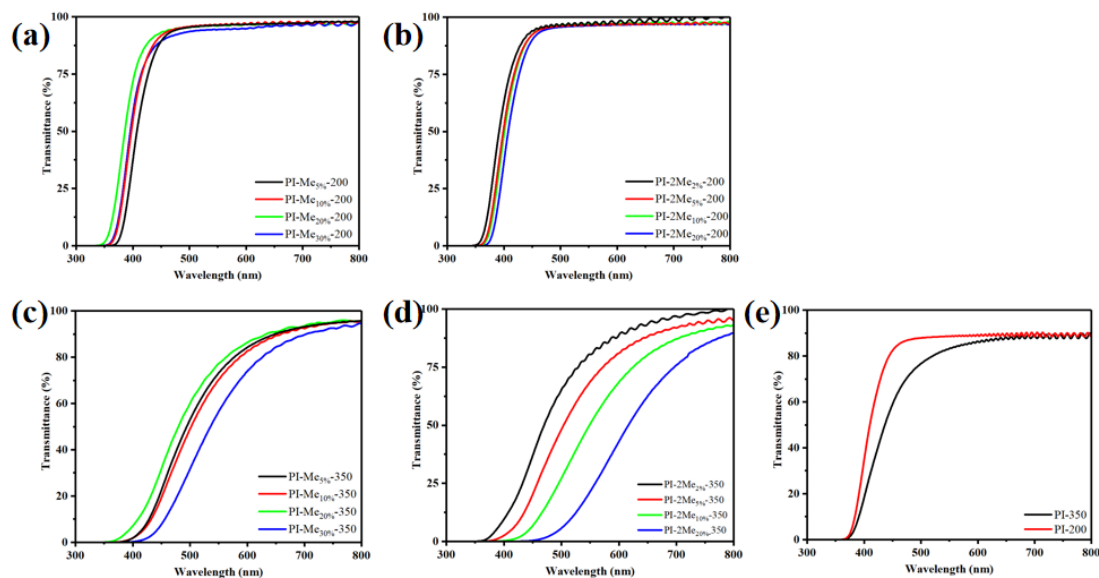

Fig. S12. UV-vis transmission spectra of (a) (MePMNH<sub>2</sub>/ODA)/ODPA co-PI films cured at 200 °C, (b) (2MePMNH<sub>2</sub>/ODA)/ODPA co-PI films cured at 200 °C, (c) (MePMNH<sub>2</sub>/ODA)/ODPA co-PI films cured at 350 °C, (d) (2MePMNH<sub>2</sub>/ODA)/ODPA co-PI films cured at 350 °C, and (e) ODA/ODPA PI films.

## VIII. Additional detailed data of PI films.

**Table S1.** Detailed data of CTE and dichroic ratio of the resulting PI films cured at 350°C.

| Sample Name                | CTE (ppm/K) | Dichroic ratio | Diamine Ratio(n)                  |
|----------------------------|-------------|----------------|-----------------------------------|
| PI-350                     | 68.33       | 2.09           | ODA                               |
| PI-Me <sub>5%</sub> -350   | 55.57       | 2.02           | ODA:MePMNH <sub>2</sub> =0.5:9.5  |
| PI-Me <sub>10%</sub> -350  | 59.48       | 2.07           | ODA:MePMNH <sub>2</sub> =1.0:9.0  |
| PI-Me <sub>20%</sub> -350  | 54.25       | 2.17           | ODA:MePMNH <sub>2</sub> =2.0:8.0  |
| PI-Me <sub>30%</sub> -350  | 49.86       | 2.18           | ODA:MePMNH <sub>2</sub> =3.0:7.0  |
| PI-2Me <sub>2%</sub> -350  | 54.78       | 2.10           | ODA:2MePMNH <sub>2</sub> =0.2:9.8 |
| PI-2Me <sub>5%</sub> -350  | 53.15       | 2.05           | ODA:2MePMNH <sub>2</sub> =0.5:9.5 |
| PI-2Me <sub>10%</sub> -350 | 50.96       | 2.09           | ODA:2MePMNH <sub>2</sub> =1.0:9.0 |
| PI-2Me <sub>20%</sub> -350 | 47.44       | 2.05           | ODA:2MePMNH <sub>2</sub> =2.0:8.0 |

**Table S2** Solubility of the resulting PI films cured at 200°C in this study<sup>a</sup>.

| Sample Name                | NMP  | DMF  | DMAc | DMSO | THF  |
|----------------------------|------|------|------|------|------|
| PI-200                     | ++-- | +--- | +--- | +--- | ---- |
| PI-Me <sub>5%</sub> -200   | ++-- | +--- | +--- | +--- | ---- |
| PI-Me <sub>10%</sub> -200  | ++-- | +--- | +--- | +--- | ---- |
| PI-Me <sub>20%</sub> -200  | ++++ | +++- | +++- | +++- | ---- |
| PI-Me <sub>30%</sub> -200  | ++++ | +++- | +++- | +++- | ---- |
| PI-2Me <sub>2%</sub> -200  | ++-- | +--- | +--- | +--- | ---- |
| PI-2Me <sub>5%</sub> -200  | ++-- | +--- | +--- | +--- | ---- |
| PI-2Me <sub>10%</sub> -200 | ++-- | +--- | +--- | +--- | ---- |
| PI-2Me <sub>20%</sub> -200 | +++- | +++- | +++- | +--- | ---- |

<sup>a</sup> + + + +: soluble at room temperature; + + + -: partially soluble at room temperature; + + --: soluble by heating; + ---: partially soluble by heating; and - - - -: insoluble by heating. Qualitative solubility was determined using 5 mg of PI film in 8 mL of solvent at room temperature.

**Table S3.** Mechanical and thermal properties of the resulting PI films cured at 350°C.

| Sample Name               | $T_{d5\%}$ (°C) | $T_{d10\%}$ (°C) | $T_g$ (°C) | $R_{800^\circ\text{C}}$ (°C) | $E$ (GPa) | $\sigma_{\text{max}}$ (MPa) | $\epsilon_b$ (%) |
|---------------------------|-----------------|------------------|------------|------------------------------|-----------|-----------------------------|------------------|
| PI-350                    | 516             | 545              | 264        | 54.93                        | 2.89      | 159                         | 29.1             |
| PI-Me <sub>5%</sub> -350  | 513             | 545              | 272        | 56.59                        | 3.12      | 122                         | 13.0             |
| PI-Me <sub>10%</sub> -350 | 515             | 545              | 287        | 55.45                        | 3.13      | 162                         | 22.2             |
| PI-Me <sub>20%</sub> -350 | 479             | 529              | 302        | 52.28                        | 3.32      | 140                         | 11.7             |

|                            |     |     |     |       |      |     |      |                  |
|----------------------------|-----|-----|-----|-------|------|-----|------|------------------|
| PI-Me <sub>30%</sub> -350  | 494 | 544 | 305 | 54.02 | 3.47 | 126 | 9.5  | <b>Table S4.</b> |
| PI-2Me <sub>2%</sub> -350  | 512 | 543 | 280 | 57.25 | 3.18 | 135 | 15.2 |                  |
| PI-2Me <sub>5%</sub> -350  | 516 | 545 | 280 | 57.56 | 4.09 | 162 | 19.1 |                  |
| PI-2Me <sub>10%</sub> -350 | 517 | 547 | 298 | 55.80 | 3.56 | 150 | 31.2 |                  |
| PI-2Me <sub>20%</sub> -350 | 503 | 541 | 306 | 54.07 | 3.85 | 160 | 29.1 |                  |

Dielectric properties of the resulting PI and commercial kapton film.

| Sample Name                | Dielectric constant (10 GHz) | Dielectric loss factors (10 <sup>-2</sup> ) (10 GHz) |
|----------------------------|------------------------------|------------------------------------------------------|
| PI-350                     | 3.24                         | 1.20                                                 |
| PI-Me <sub>5%</sub> -350   | 3.08                         | 1.11                                                 |
| PI-Me <sub>10%</sub> -350  | 3.04                         | 1.06                                                 |
| PI-Me <sub>20%</sub> -350  | 3.33                         | 1.50                                                 |
| PI-Me <sub>30%</sub> -350  | 3.49                         | 1.73                                                 |
| PI-2Me <sub>2%</sub> -350  | 3.09                         | 1.26                                                 |
| PI-2Me <sub>5%</sub> -350  | 3.27                         | 0.92                                                 |
| PI-2Me <sub>10%</sub> -350 | 3.42                         | 1.12                                                 |
| PI-2Me <sub>20%</sub> -350 | 3.52                         | 1.32                                                 |
| PI-200                     | 3.30                         | 1.44                                                 |
| PI-Me <sub>5%</sub> -200   | 3.23                         | 1.38                                                 |
| PI-Me <sub>10%</sub> -200  | 3.00                         | 1.11                                                 |
| PI-Me <sub>20%</sub> -200  | 3.13                         | 0.89                                                 |
| PI-Me <sub>30%</sub> -200  | 3.42                         | 1.23                                                 |
| PI-2Me <sub>2%</sub> -200  | 3.18                         | 1.26                                                 |
| PI-2Me <sub>5%</sub> -200  | 3.38                         | 1.26                                                 |
| PI-2Me <sub>10%</sub> -200 | 3.40                         | 1.18                                                 |
| PI-2Me <sub>20%</sub> -200 | 3.47                         | 1.23                                                 |
| kapton film                | 3.41                         | 1.57                                                 |

**Table S5.** The performance of reported low temperature curable PI films.

| Ref | Thermal properties |             | Mechanical properties |              |       | Electrical properties |          | Curing conditions |             | Dosage |
|-----|--------------------|-------------|-----------------------|--------------|-------|-----------------------|----------|-------------------|-------------|--------|
|     | $T_g$              | $T_{d,5\%}$ | $\sigma_{max}$        | $\epsilon_b$ | $E$   | $D_k$                 | $D_f$    | $T_c$             | Accelerator |        |
|     | [°C]               | [°C]        | [MPa]                 | [%]          | [GPa] | (10 GHz)              | (10 GHz) | [°C]              |             |        |
| 6   | 271                | 543         | 89                    | 5.5          | 2.21  | -                     | -        | 320               | -           | -      |
| 7   | 225                | 510         | -                     | -            | -     | -                     | -        | 220               | QL          | 700%   |
| 8   | 289                | 592         | 112                   | 75.5         | 1.27  | -                     | -        | 200               | QL          | 200%   |
| 9   | 428                | 526         | 91                    | 15           | 6.34  | 3.36                  | -        | 200               | A-BZI       | 4.14%  |
| 10  | 271                | 551         | 109                   | 7.0          | 3.3   | -                     | -        | 200               | -           | -      |
| 10  | 291                | 546         | 122                   | 8.6          | 3.5   | -                     | -        | 200               | -           | -      |

|           |     |       |        |        |      |      |       |     |                   |       |
|-----------|-----|-------|--------|--------|------|------|-------|-----|-------------------|-------|
| 11        | 376 | 576   | 148    | 98.49  | 1.66 | -    | -     | 200 | QL                | 150%  |
| 12        | -   | 480   | -      | -      | -    | -    | -     | 280 | Et <sub>3</sub> N | 66.7% |
| 1         | -   | 545   | 134.82 | 145.16 | 1.66 | 3.36 | 2.89% | 200 | QL                | 150%  |
| 1         | -   | 456   | 105.40 | 45.37  | 1.01 | 3.46 | 3.23% | 200 | IQL               | 150%  |
| 13        | 281 | -     | -      | -      | -    | -    | -     | 160 | -                 | -     |
| 14        | 272 | 546.1 | -      | -      | -    | -    | -     | 300 | -                 | -     |
| 15        | 292 | 558   | 150    | 14.3   | 3.1  | -    | -     | 200 | -                 | -     |
| This work | 230 | 455   | 151    | 8.2    | 3.83 | 3.13 | 0.89% | 200 | -                 | -     |
| This work | 246 | 515   | 163    | 21.1   | 4.13 | 3.38 | 1.26% | 200 | -                 | -     |

## References

- 1 C. Huang, J. Li, D. Sun, R. Xuan, Y. Sui, T. Li, L. Shang, G. Zhang, R. Sun and C. P. Wong, *Journal of Materials Chemistry C*, 2020, **8**, 14886-14894.
- 2 C. Pu, D. Lin, H. Xu, F. Liu, H. Gao, G. Tian, S. Qi and D. Wu, *Polymer*, 2022, **255**, 125119.
- 3 V.M. Svetlichnyi, N.G. Antonov, B.V. Chernitsa, V.M. Denisov, A.I. Koltsov, V.V. Kudryavtsev and M.M. Koton, *Vysokomolekulyarnye Soedineniya Seriya A*, 1986, **28**, 2412-2418.
- 4 F. Weigend and R. Ahlrichs, *Physical Chemistry Chemical Physics*, 2005, **7**, 3297-3305.
- 5 C.T. Lee and W.T. Yang, *Physical Review B*, 1988, **37**, 785-789.
- 6 J.O. Simpson and A.K. St Clair, *Thin Solid Films*, 1997, **308**, 480-485.
- 7 R. Lian, X. Lei, Y. Chen and Q. Zhang, *Journal of Applied Polymer Science*, 2019, **136**, 47771.
- 8 Y. Ding, B. Bikson and J.K. Nelson, *Macromolecules*, 2002, **35**, 905-911.
- 9 Y. Sui, J. Li, T. Wang, D. Sun, C. Huang, F. Zhang, L. Shan, F. Niu, G. Zhang and

- R. Sun, *Polymer*, 2021, **218**, 123514.
- 10 C. Li, Y. Wang, Y. Yin, Y. Li, J. Li, D. Sun, J. Lu, G. Zhang and R. Sun, *Polymer*, 2021, **228**, 123963.
- 11 C. Huang, J. Li, G. Zhang and R. Sun, *Macromolecular Materials and Engineering*, 2019, **304**, 1900505.
- 12 W.-H. Liao, S.-Y. Yang, S.-T. Hsiao, Y.-S. Wang, S.-M. Li, C.-C.M. Ma, H.-W. Tien and S.- J. Zeng, *ACS Appl. Mater. Interfaces*, 2014, **6**, 15802–15812.
- 13 X. Han, Y. Tian, L. Wang, C. Xiao and B. Liu, *European Polymer Journal*, 2007, **43**, 4382-4388.
- 14 X. Liu, X.W. Cao, G.J. He and T.C. Xing, *Express Polymer Letters*, 2019, **13**, 524-532.
- 15 C. Li, G. Zhang, J. Li and Y. Sui, *International Conference on Electronic Packaging Technology*, 2021.
